# Supplementary material for: The Occurrence of Aflatoxins in Date Palm (Phoenix dactylifera L.) Worldwide
Source: Hindawi journal article supplement (doi:10.1155/2022/1326861), 2022-03-07
Supplement: f1 [file 1326861.f1.docx]

**Supplementary Information**

**The occurrence of aflatoxins in date palm (*Phoenix dactylifera* L.) worldwide**

Merfat Abdulrahman Almaghrabi

*Food and Nutrition Department, King Abdulaziz University, P.O. Box 80200, Jeddah 21589, Saudi Arabia.*

*Correspondence: mamaghrabi@kau.edu.sa; Tel.: +966-504685978*

Figure S1: Dates global average production in tonnes by counties for the period 2010-2019. The data extracted from the FAOSTAT database of the UN Food and Agriculture Organization (Food and Agriculture Orgnization, 2021)
